# Supplementary material
Source: publisher figshare collection journal article supplement (https://acs.figshare.com/ndownloader/files/17459321)
Supplement: Supplementary file 1 [file 17459321]

***Viola “inconspicua”* No More: An Analysis of Antibacterial Cyclotides**

Nicole C. Parsley, Patric W. Sadecki, Conrad J. Hartmann and Leslie M. Hicks

Department of Chemistry, University of North Carolina at Chapel Hill, NC, United States

Contents:

**Figure S1:** CID MS/MS spectra of gluC linearized cyl1 and chymotrypsin digested cyl1 fragment.

**Figure S2:** CID MS/MS spectra of gluC linearized cyl2 and chymotrypsin digested cyl2 fragment.

**Figure S3:** CID MS/MS spectra of gluC linearized cyl4 and chymotrypsin digested cyl4 fragment.

**Figure S4:** CID MS/MS spectra of gluC linearized cyl5 and chymotrypsin digested cyl5 fragment.

**Figure S5:** CID MS/MS spectra of gluC linearized cyl6 and chymotrypsin digested cyl6 fragment.

**Table S1:** Putative cyclotide masses identified in *V. inconspicua* reduction/alkylation LC-MS mass shift analysis.

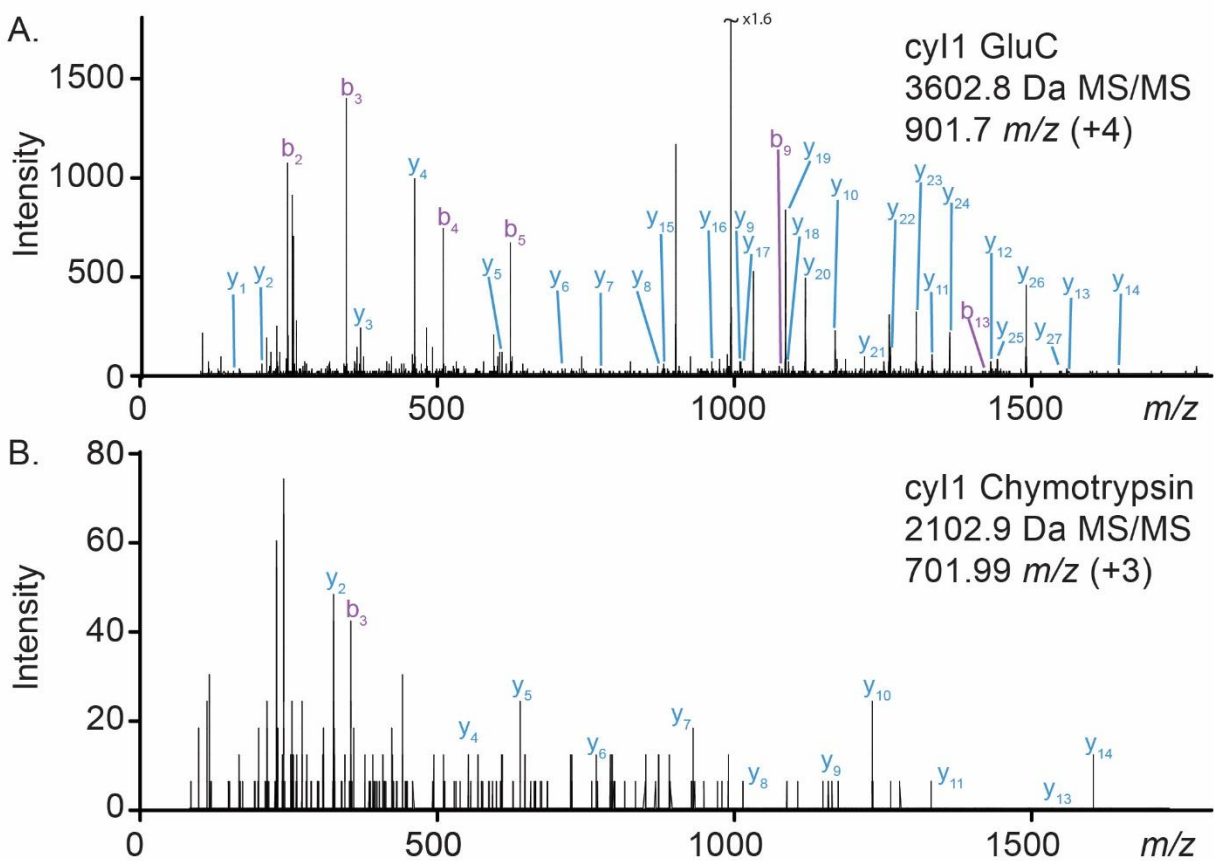

**Figure S1.** *V. inconspicua* cyclotide *cyl1* (3236.4 Da) CID MS/MS spectra of (A) gluC linearized *cyl1* (+4) and (B) *cyl1* chymotrypsin fragment 2102.9 Da (+3). Spectra are annotated with b (purple) and y (blue) ion series.

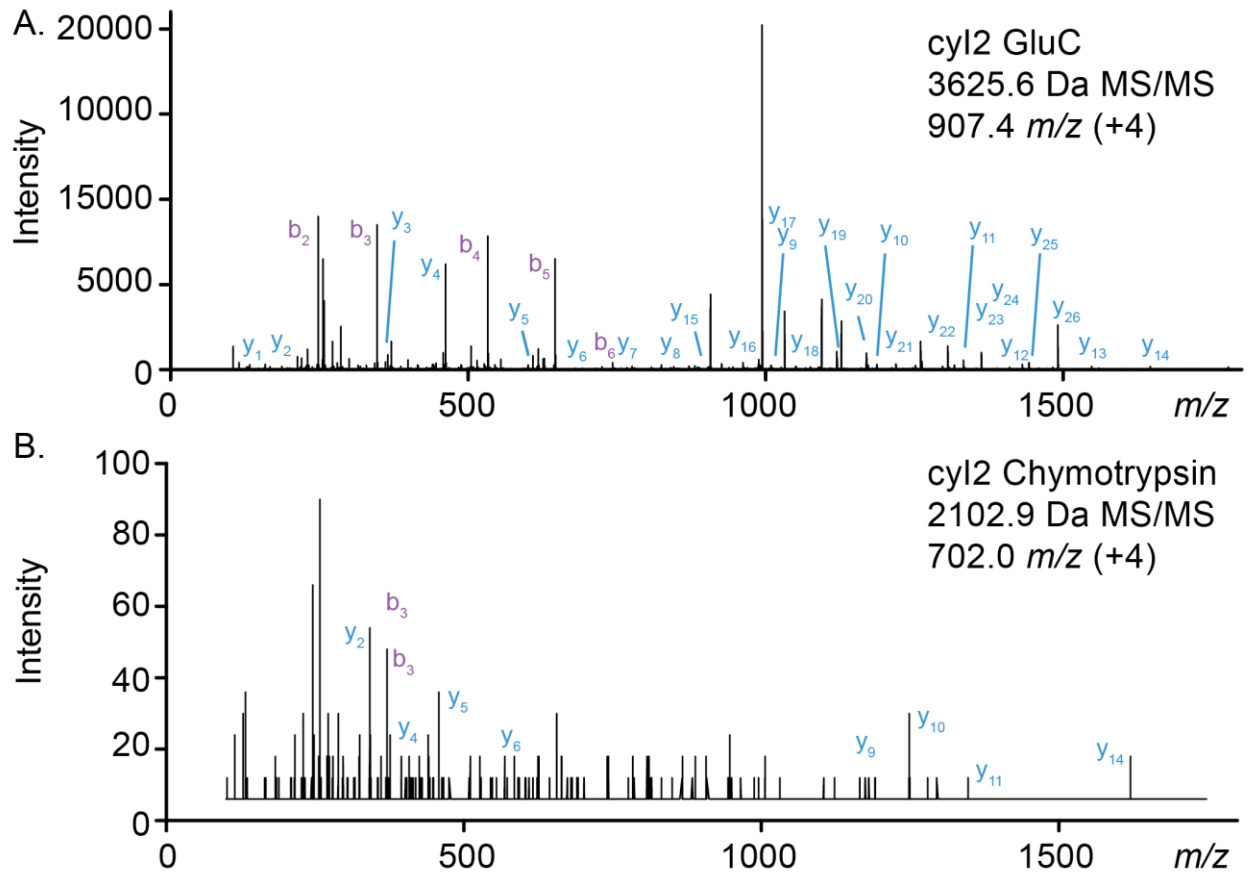

**Figure S2.** *V. inconspicua* cyclotide cyl2 (3259.4 Da) CID MS/MS spectra of (A) gluC linearized cyl2 (+4) and (B) cyl2 chymotrypsin fragment 2102.9 Da (+2). Spectra are annotated with b (purple) and y (blue) ion series.

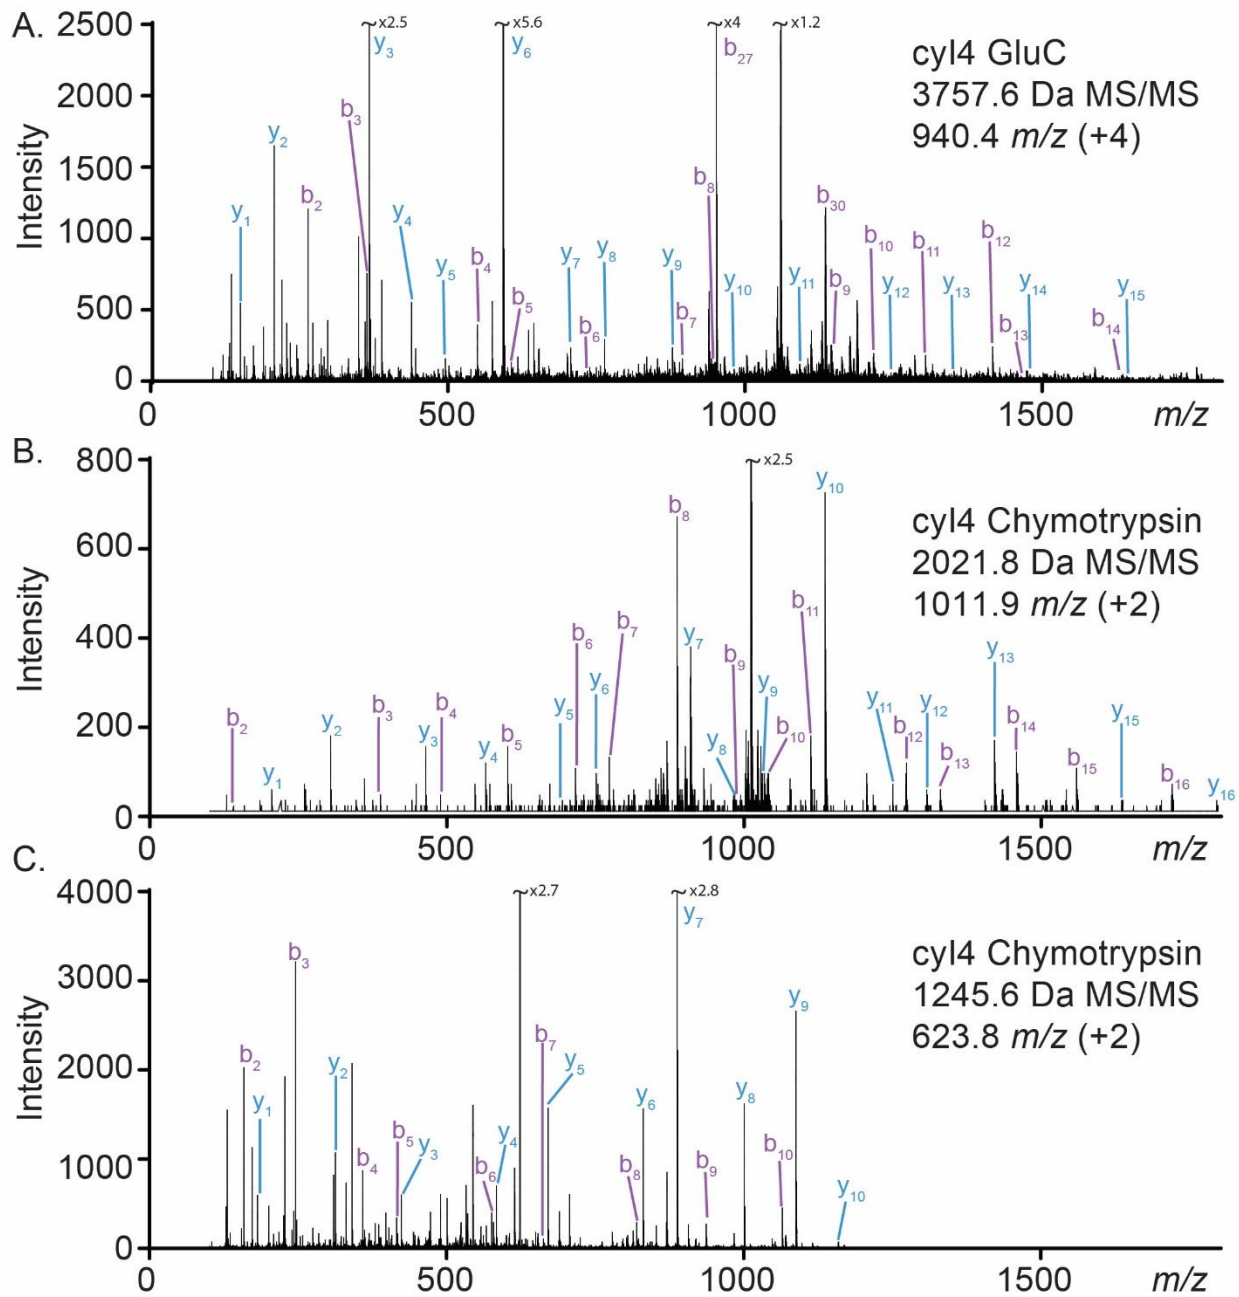

**Figure S3.** *V. inconspicua* cyclotide cyl4 (3391.4 Da) CID MS/MS spectra of (A) gluC linearized cyl4 (+4), (B) cyl3 chymotrypsin fragment 2021.8 Da (+2), and (C) cyl4 chymotrypsin fragment 1245.6 Da (+2). Spectra are annotated with b (purple) and y (blue) ion series.



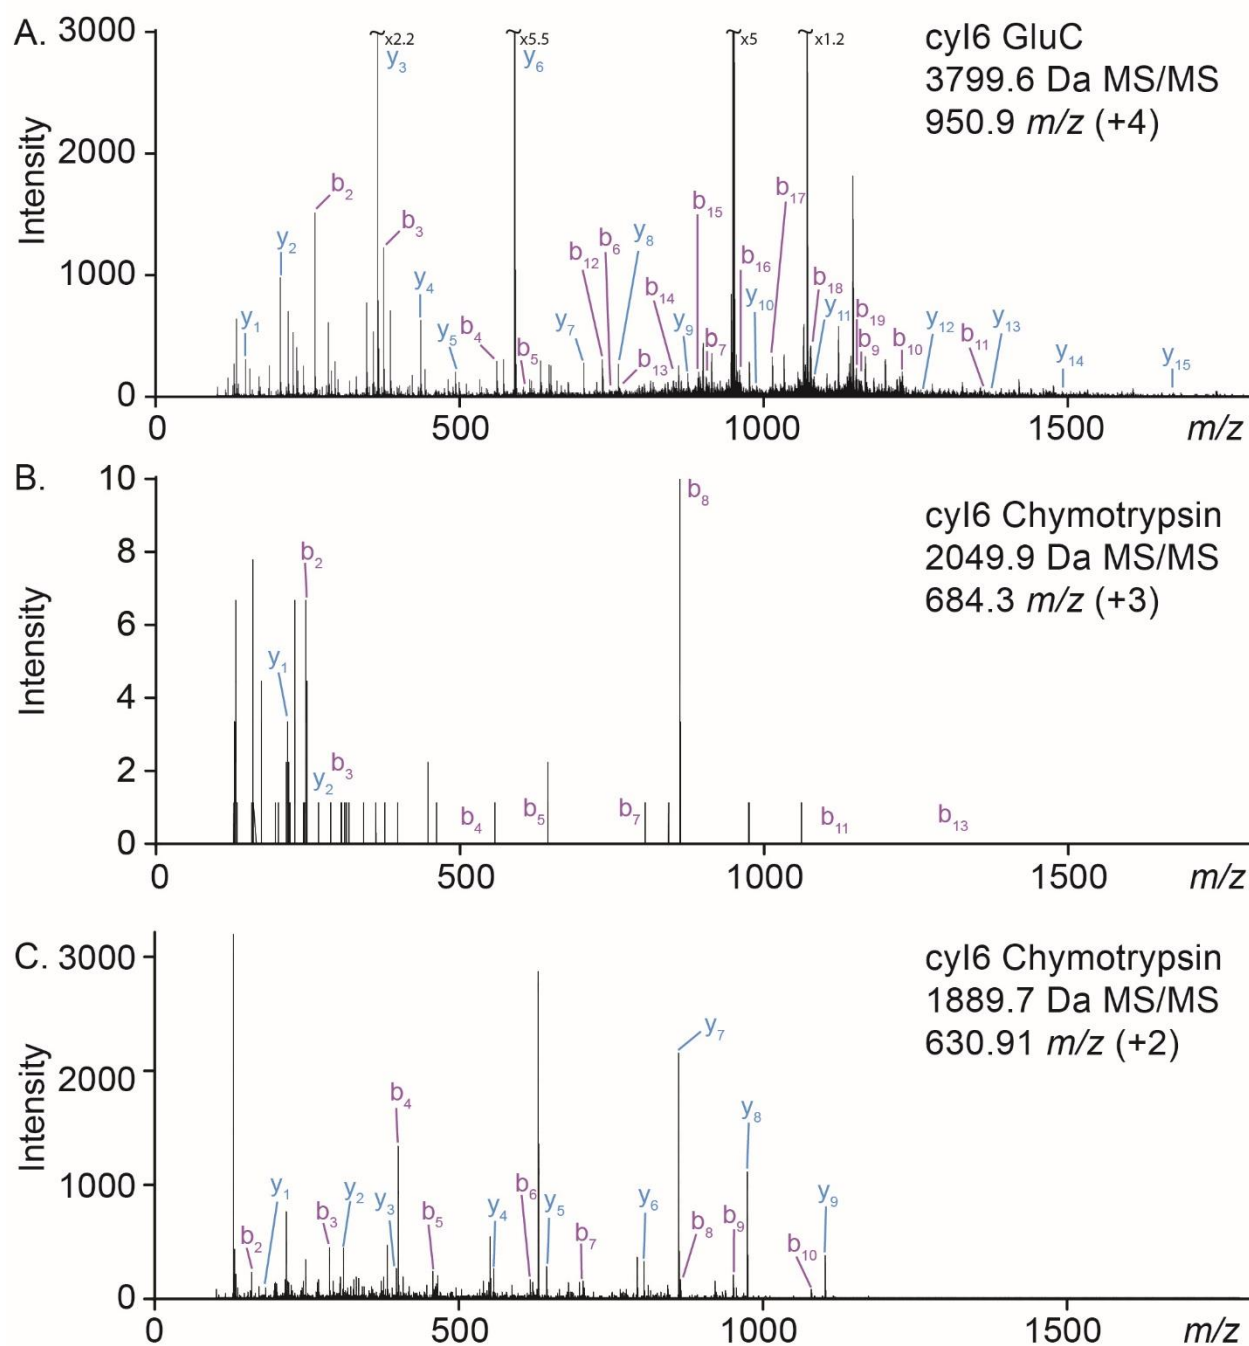

**Figure S5.** *V. inconspicua* cyclotide cyl6 (3433.5 Da) CID MS/MS spectra of (A) gluC linearized cyl6 (+4), (B) cyl6 chymotrypsin fragment 2049.9 Da (+3), and (C) cyl6 chymotrypsin fragment 1889.7 Da (+2). Spectra are annotated with b (purple) and y (blue) ion series.

**Table S1.** Putative cyclotide masses identified in *V. inconspicua* reduction/alkylation LC-MS mass shift analysis exhibiting 348.16 Da mass shift. Asterisks indicate known cyclotide sequences previously identified in different botanical species. Novel cyclotide sequences described herein are denoted with cyl1-6 nomenclature. Mass species are denoted by Type I, Type II, or Mixed as per CID MS/MS fingerprint ion identifications. Mixed species were not resolved from other cyclotidyl species in the MS1 and thus conflicting fingerprint fragment ions confounded motif type identification.

|    | Mass (Da) | Identity      |  |    | Mass (Da) | Identity       |
|----|-----------|---------------|--|----|-----------|----------------|
| 1  | 3099.3    |               |  | 24 | 3277.5    |                |
| 2  | 3108.4    | viba 11*      |  | 25 | 3291.4    |                |
| 3  | 3116.3    |               |  | 26 | 3303.5    |                |
| 4  | 3138.4    | cyO9*         |  | 27 | 3317.4    | <b>Type I</b>  |
| 5  | 3140.4    |               |  | 28 | 3319.4    |                |
| 6  | 3142.4    |               |  | 29 | 3332.4    |                |
| 7  | 3156.4    |               |  | 30 | 3347.4    |                |
| 8  | 3170.4    |               |  | 31 | 3373.5    | <b>Mixed</b>   |
| 9  | 3208.4    | <b>Type I</b> |  | 32 | 3378.5    | cyl3           |
| 10 | 3225.4    | cyO8*         |  | 33 | 3382.5    |                |
| 11 | 3229.5    |               |  | 34 | 3391.5    | cyl4           |
| 12 | 3236.4    | cyl1          |  | 35 | 3394.5    |                |
| 13 | 3242.5    |               |  | 36 | 3396.5    | <b>Mixed</b>   |
| 14 | 3243.4    |               |  | 37 | 3406.5    | cyl5           |
| 15 | 3252.4    |               |  | 38 | 3408.4    |                |
| 16 | 3253.4    |               |  | 39 | 3410.5    |                |
| 17 | 3254.4    |               |  | 40 | 3423.5    |                |
| 18 | 3255.5    |               |  | 41 | 3433.5    | cyl6           |
| 19 | 3259.4    | cyl2          |  | 42 | 3437.5    | <b>Type II</b> |
| 20 | 3263.5    |               |  | 43 | 3451.5    |                |
| 21 | 3271.4    |               |  | 44 | 3465.5    |                |
| 22 | 3273.5    |               |  | 45 | 3526.5    |                |
| 23 | 3275.4    |               |  |    |           |                |
